# Supplementary material for: Polyelectrolytes in Hot Melt Extrusion: A Combined Solvent-Based and Interacting Additive Technique for Solid Dispersions
Source: MDPI journal article supplement (doi:10.3390/pharmaceutics11040174), 2019-04-10
Supplement: s1 [file s1]

*Supplementary Materials*

# Polyelectrolytes in Hot Melt Extrusion: A Combined Solvent-Based and Interacting Additive Technique for Solid Dispersions

Felix Ditzinger <sup>1,2</sup>, Catherine Dejoie <sup>3</sup>, Dubravka Sisak Jung <sup>4</sup> and Martin Kuentz <sup>2,\*</sup>

<sup>1</sup> Department of Pharmaceutical Sciences, University of Basel, 4056 Basel, Switzerland; felix.ditzinger@fhnw.ch

<sup>2</sup> Institute of Pharma Technology, University of Applied Sciences and Arts Northwestern Switzerland, Hofackerstr. 30, 4132 Muttenz, Switzerland

<sup>3</sup> European Synchrotron Radiation Facility, 38000 Grenoble, France; catherine.dejoie@esrf.fr

<sup>4</sup> Department of Chemistry, University of Zurich, 8057 Zurich, Switzerland; to dubravka.sisak@chem.uzh.ch

\* Correspondence: martin.kuentz@fhnw.ch; Tel.: +41-61-228-5642

Received: 25 February 2019; Accepted: 5 April 2019; Published: 10 April 2019

## Supporting Data

### *Powder X-ray diffraction patterns*

The following graphs were used for the final formulation evaluation of the polyelectrolyte matrices. The following powder X-ray diffraction (PXRD) analyses were based on the benchtop X-ray diffractometer that is described in the methods section.

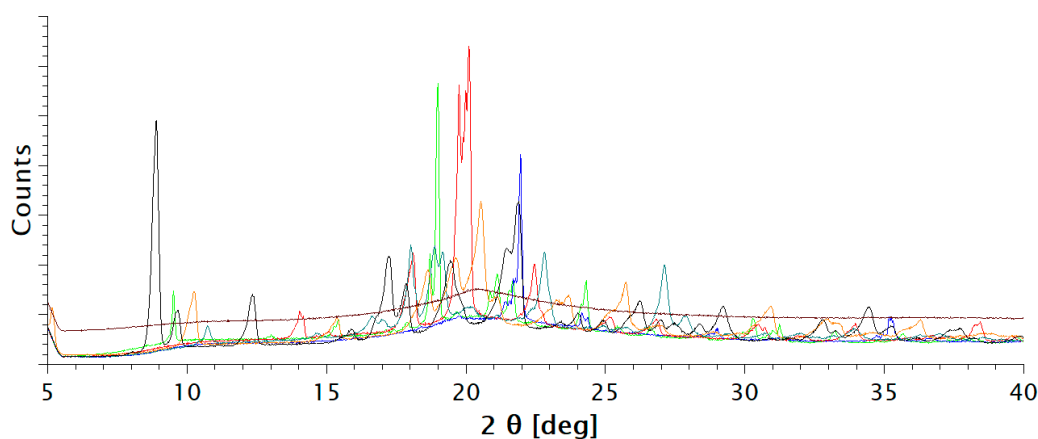

**Figure S1.** PXRD patterns of the physical mixtures. Colors and labels are in line with Figure 2 and 8, which can be inferred from the main article. The diffraction pattern of pure NaCMC is shown in bordeaux with an offset.

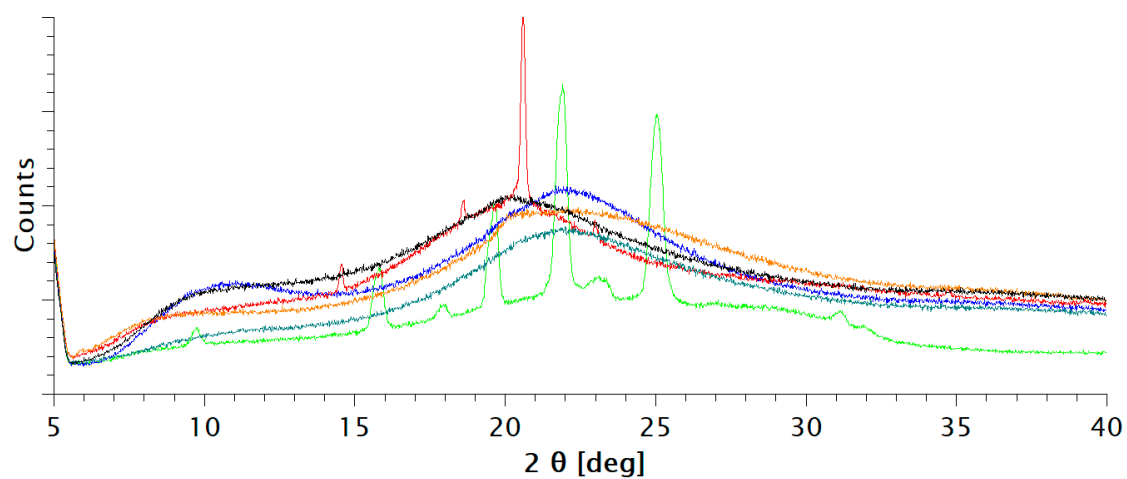

**Figure S2.** PXRD diffraction patterns of the solvent evaporates. Colors and labels are in line with Figure 2 and 8, which can be inferred from the main article.

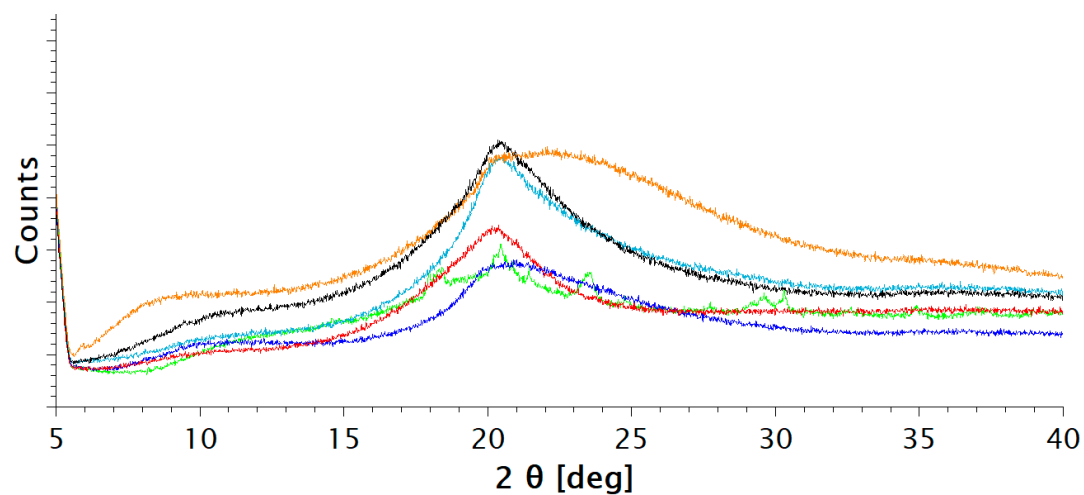

**Figure S3.** PXRD patterns of the extrudates. Colors and labels are in line with Figure 2 and 8, which can be inferred from the main article.

*Hot stage microscopy and hot stage FTIR*

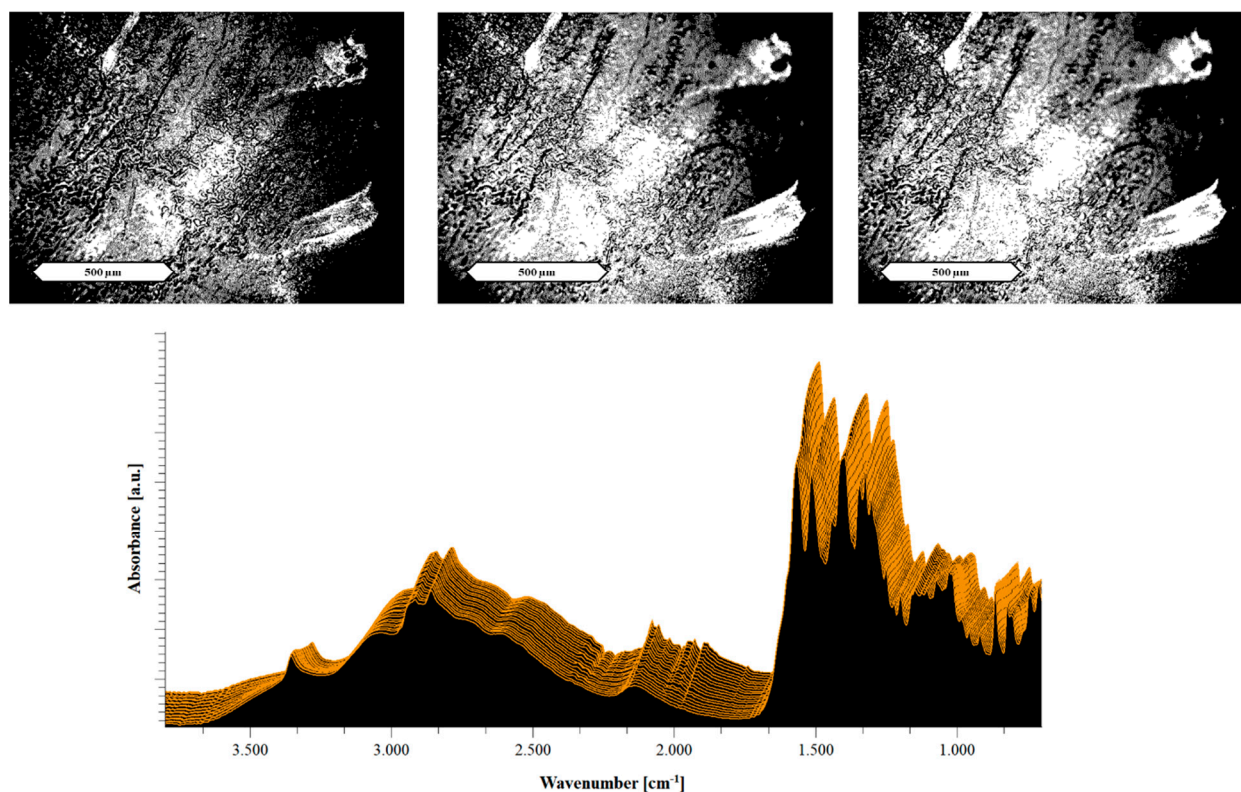

**Figure S4.** Heat resolved FTIR and HSM images of 50 % lysine / NaCMC solvent evaporates. The images at the top show HSM images taken at RT, 90 °C and 130 °C (from left to right). Each spectrum was measured at temperatures from 30°C (measured first in the front) to 130°C (in the back) by increasing steps of 5°C.

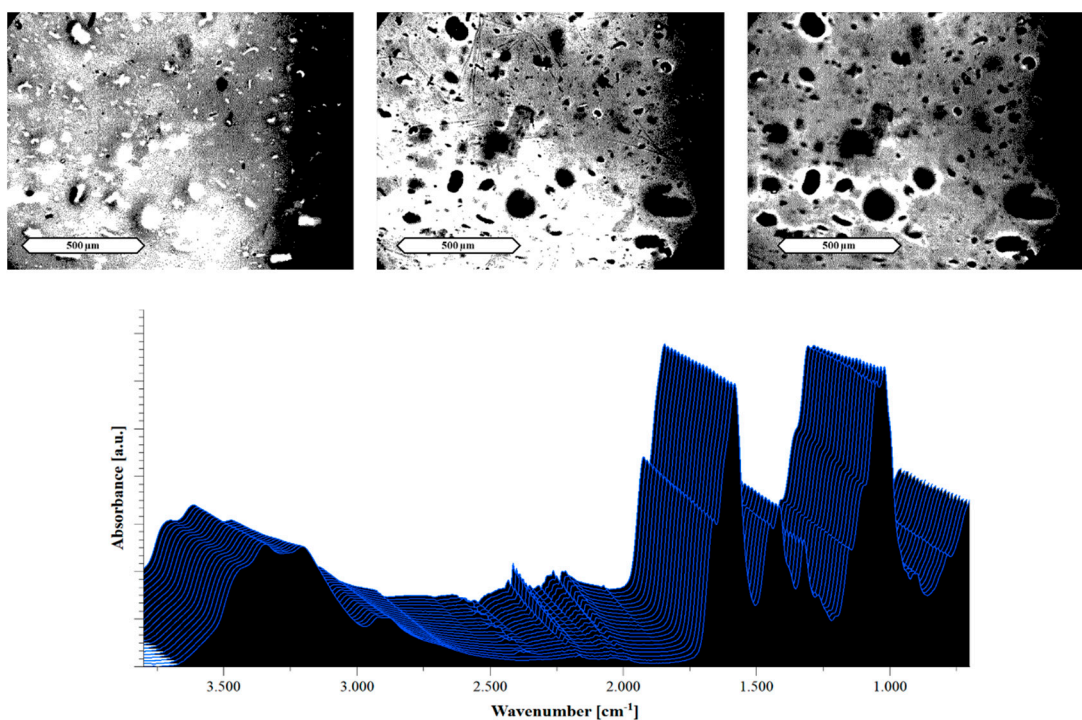

**Figure S5.** The images at the top show HSM images of 20 % urea / NaCMC solvent evaporated films taken at RT, 90 °C and 130 °C (from left to right). At the bottom, a temperature resolved FTIR spectrum is shown. Each spectrum was measured at temperatures from 30°C (measured first in the front) to 130°C (in the back) by increasing steps of 5°C
